# Supplementary material
Source: ML conference proceedings conference paper supplement (https://openreview.net/forum?id=q1R4xkf0On)
Supplement: supplementary_material [file attachment]

# Inverse Rendering for High-Genus Surface Meshes from Multi-View Images

## Supplementary Material

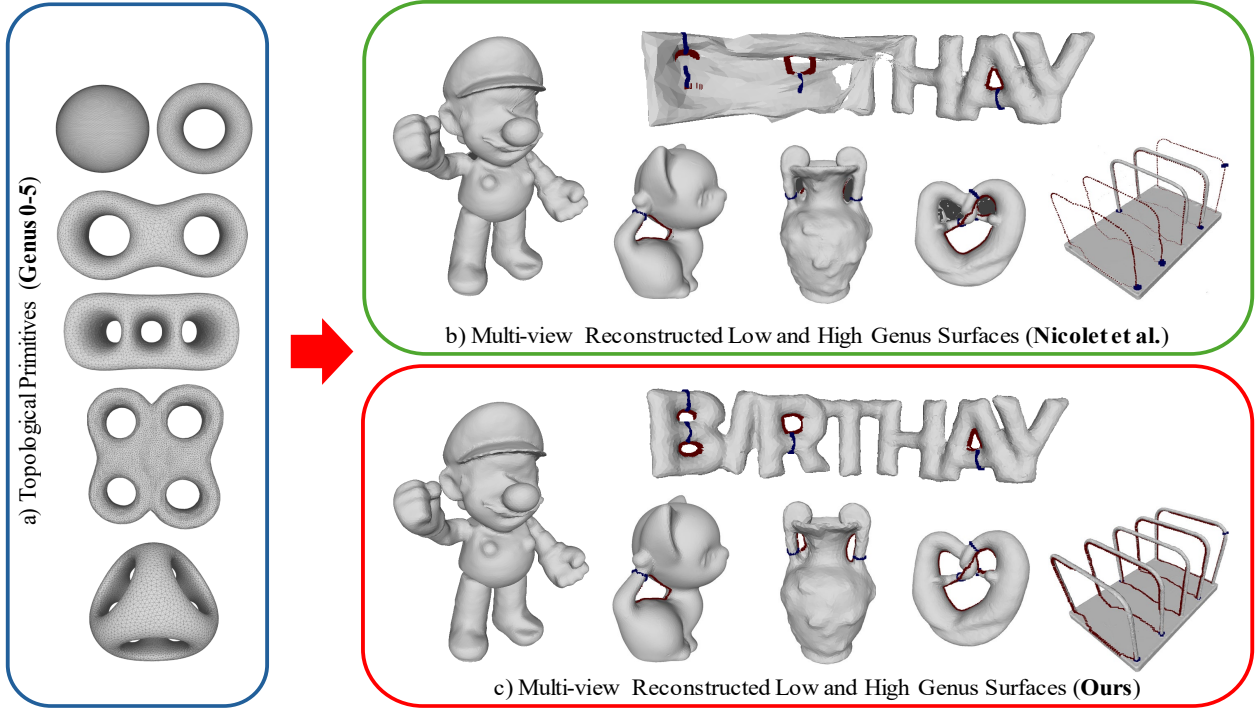

Figure 1. (a) Topological primitives that are homeomorphic to the ground truth surfaces, ensuring topological consistency. (b) Reconstructed 3D surface by minimizing the multi-view rendering loss using SOTA method [?]. (c) Reconstructed 3D surface using our method. The topological information of the ground truth is represented with tunnel loops shown in Red and handle loops in Blue for visual comparisons of topological features.

## A1. Complete Qualitative Comparisons with Nicolet et al.[? ] for Low-Genus Reconstruction

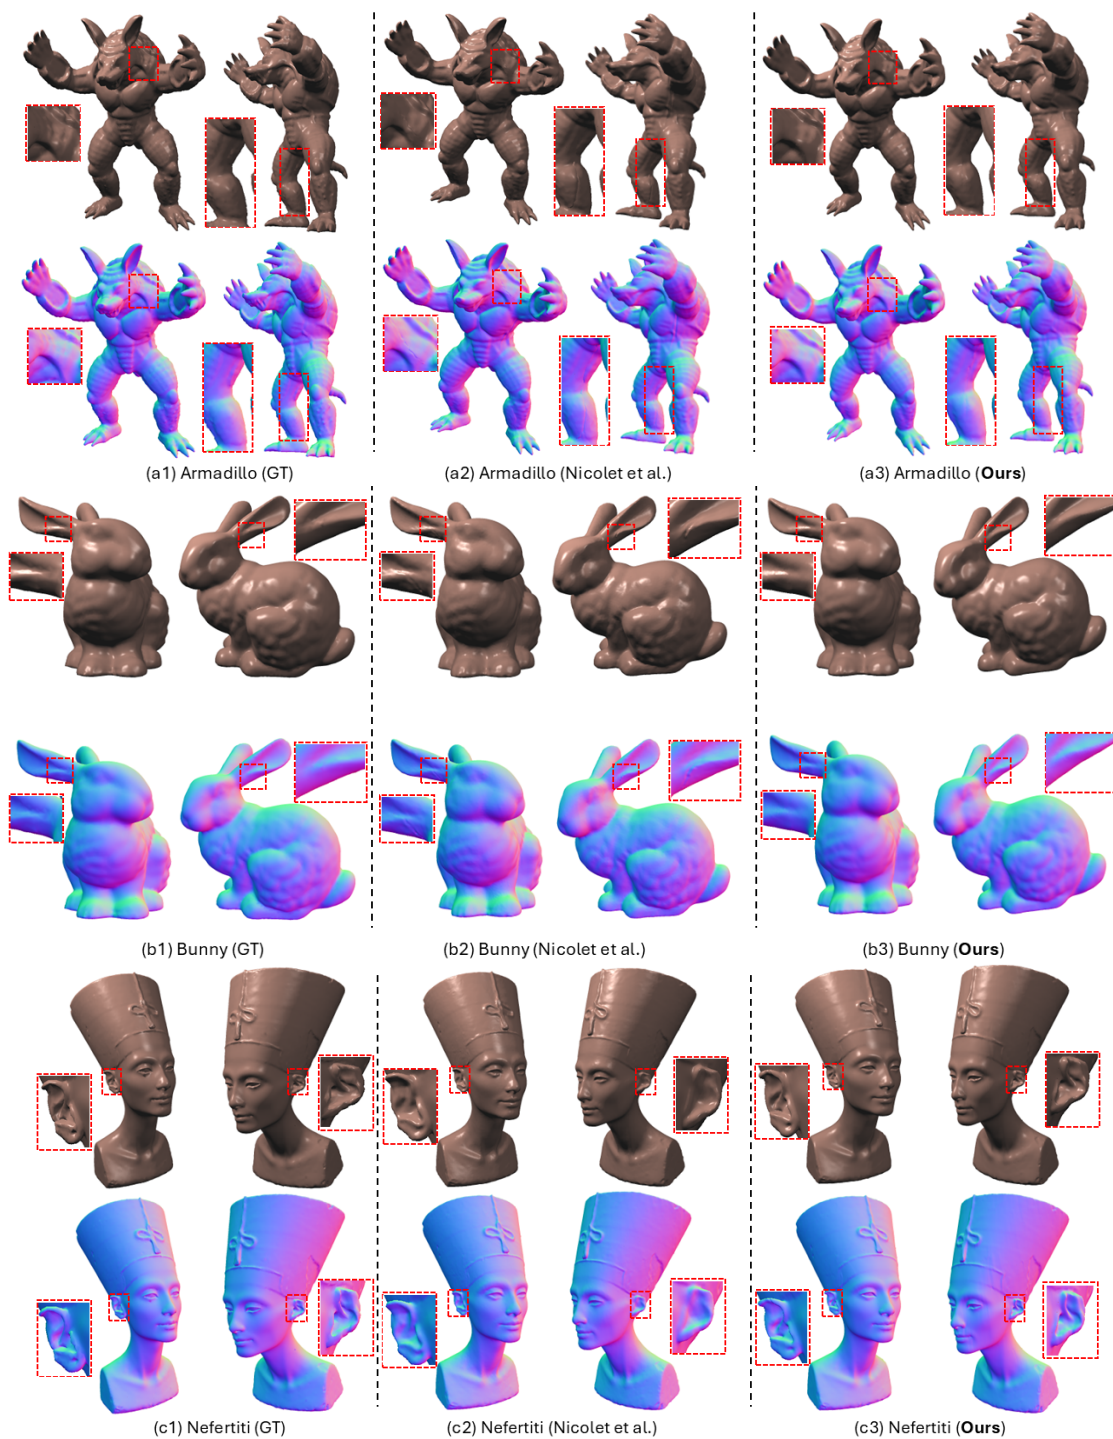



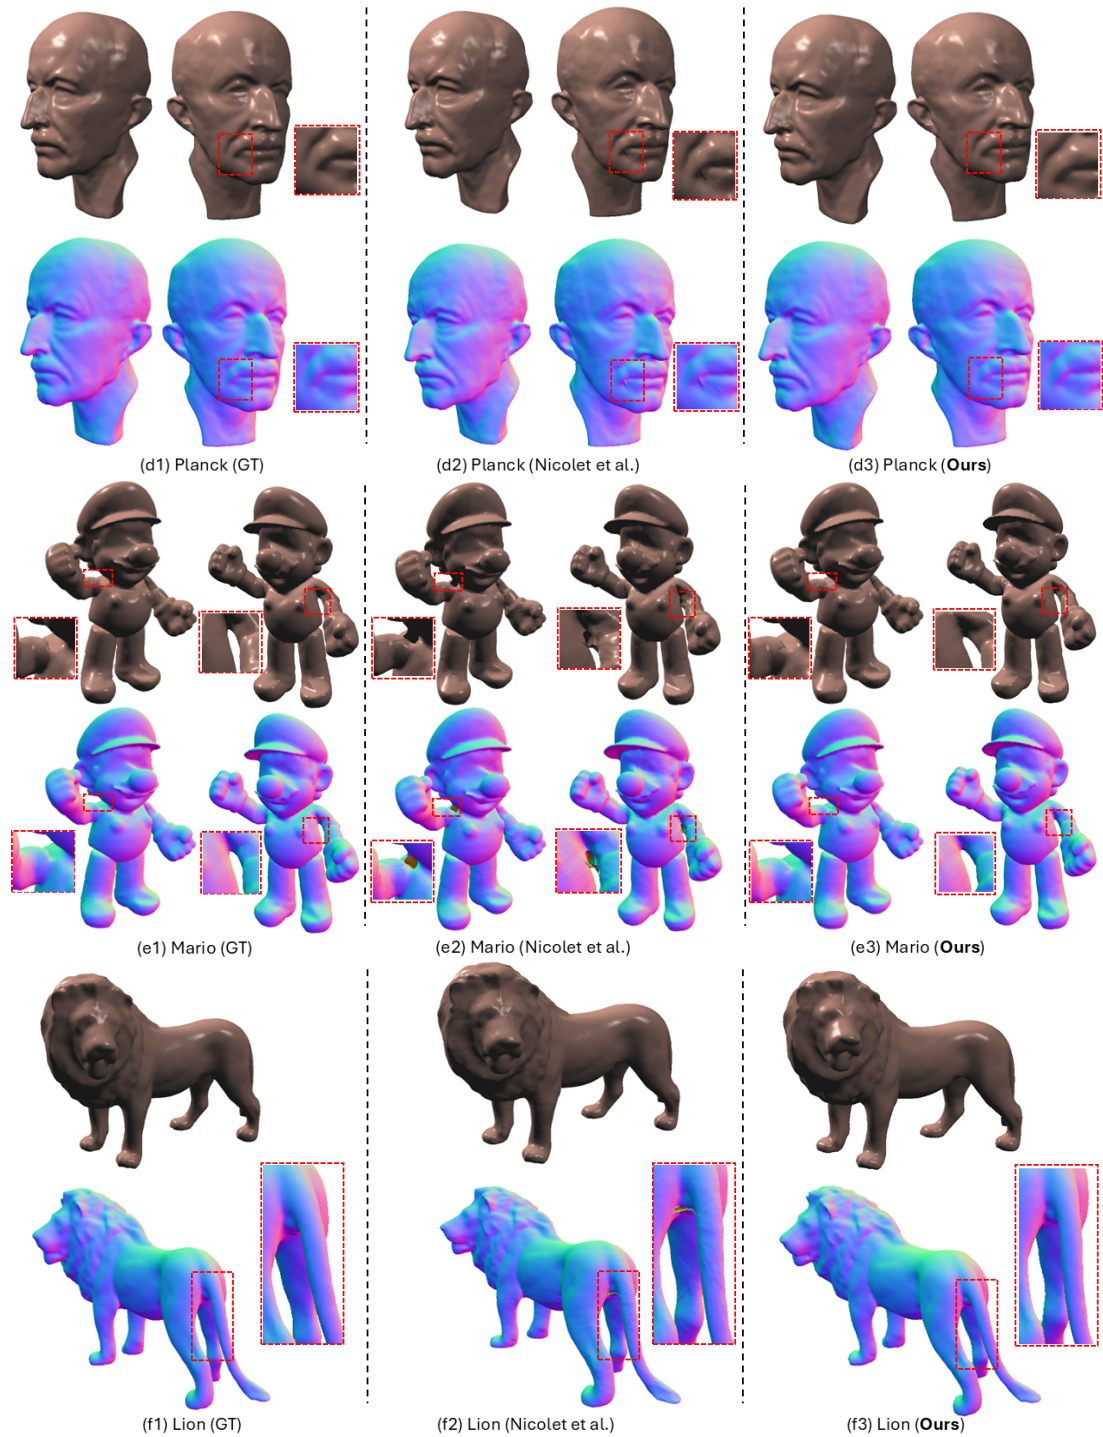

Figure 1. Qualitative Comparisons with Nicolet et al. [?] : Multi-View Reconstruction of **Low Genus (Genus-0)** Surfaces using Rendered Views and Normal Maps with a **Sphere (Genus-0)** as the **Topological Primitive**.

## A2. Complete Qualitative Comparisons with Nicolet et al.[? ] for High-Genus Reconstruction

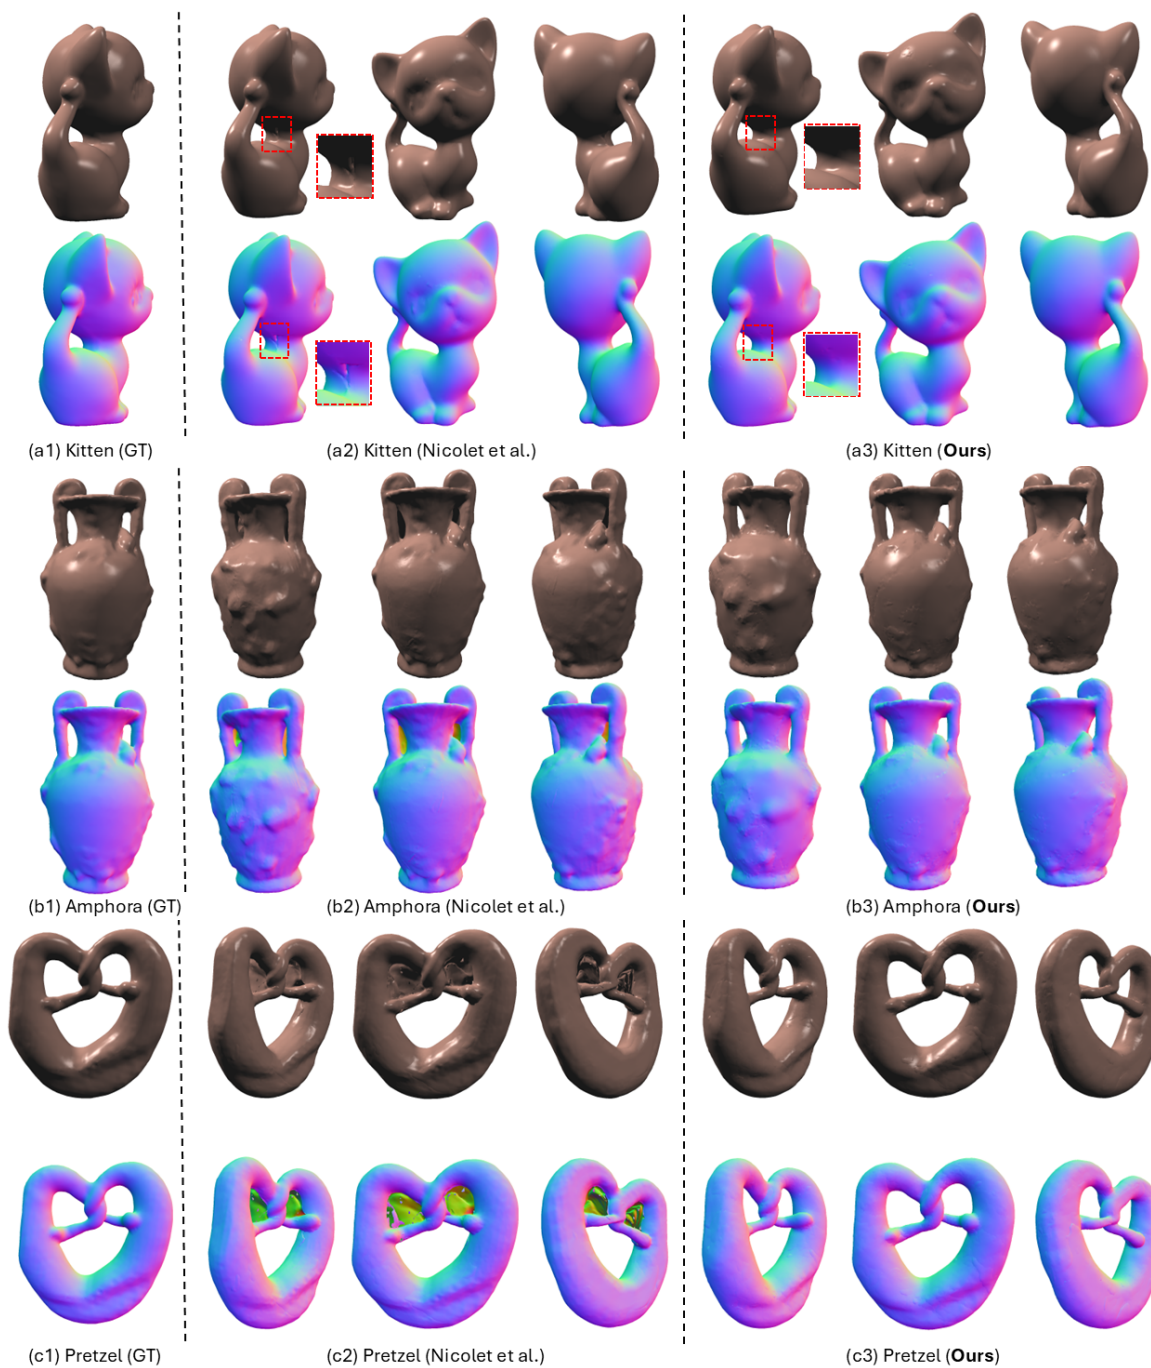

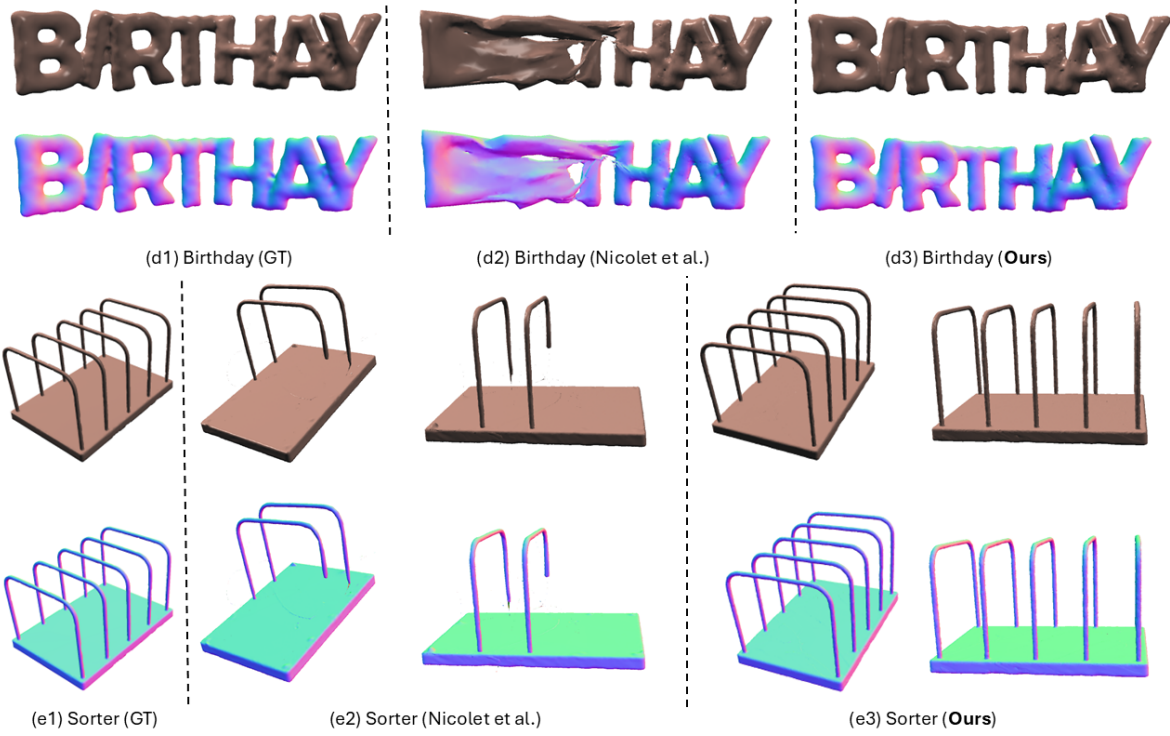

Figure 2. Qualitative Comparisons with Nicolet et al. [? ]: Multi-View Reconstruction of **High-Genus (Genus 1-5)** Surfaces using Rendered Views and Normal Maps Using Topologically Consistent **Triangulated Primitives (Genus 1, 2, 3, 4 and 5 from top to bottom, respectively)**.

## B. How to Construct Topological Primitive of Any Genus $g$ ?

### Connected Sum: An Algebraic Topology Perspective

**Definition (Connected Sum)** [? ]. The connected sum  $S_1 \oplus S_2$  is formed by deleting the interior of disks  $D_1$  and  $D_2$  from the surfaces  $S_1$  and  $S_2$ , respectively, and attaching the resulting punctured surfaces  $S_1 - D_1$  and  $S_2 - D_2$  to each other along their boundaries via a homeomorphism  $h : \partial D_1 \rightarrow \partial D_2$  as shown in **Figure 3**. Mathematically, this can be expressed as:

$$S_1 \oplus S_2 = (S_1 - D_1) \cup_h (S_2 - D_2).$$

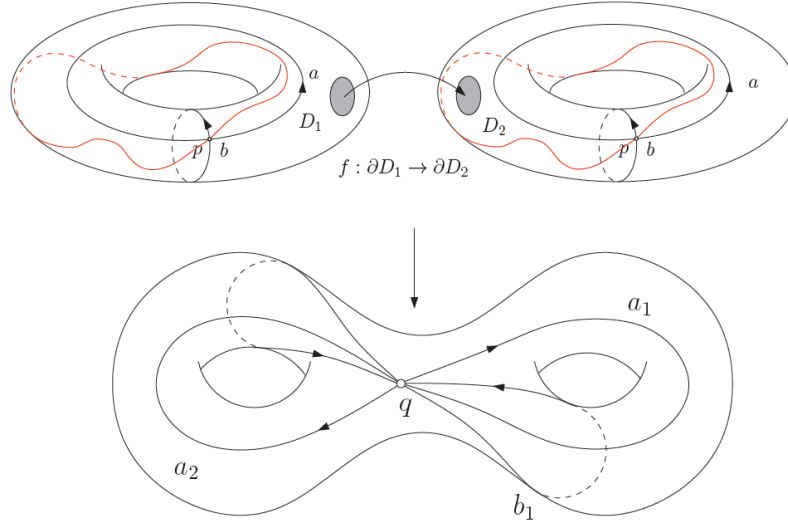

Figure 3. Two surfaces  $S_1$  and  $S_2$  are shown with disks  $D_1$  and  $D_2$  removed. These surfaces are then glued together along the boundary of the disks, resulting in a surface with a genus equal to the sum of the genera of  $S_1$  and  $S_2$ . [? ]

**Steps for Constructing a Topological Primitive Using  $S_1$  and  $S_2$ :** Say  $S_1$  and  $S_2$  are surfaces with genus  $g_1$  and  $g_2$ , respectively. Applying the definition of the direct sum provided earlier, a new surface  $S_1 \oplus S_2$  of genus  $g_1 + g_2$  can be readily constructed. By the properties of direct sums, the genus of  $S_1 \oplus S_2$  satisfies:

$$\text{genus}(S_1 \oplus S_2) = \text{genus}(S_1) + \text{genus}(S_2) = g_1 + g_2.$$

Hence, we can construct complex topological primitives of any **genus  $g$**  from the existing ones as illustrated in **Figure 4**.

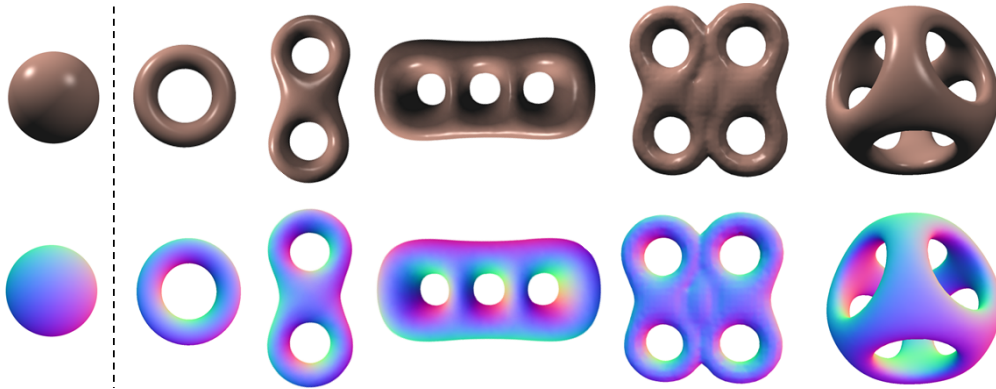

Figure 4. **Topological Primitives (genus 0–5)**. Left to right: Sphere ( $S_0$ ,  $g=0$ ), Torus ( $S_1$ ,  $g=1$ ), Double ( $S_2$ ,  $g=2$ ), Triple ( $S_3$ ,  $g=3$ ), Quadruple Torus ( $S_4$ ,  $g=4$ ), and Decocube ( $S_5$ ,  $g=5$ ).



## C. Adaptive V-Cycle Remeshing

### Halfedge Data Structure

The halfedge data structure, illustrated in **Figure 5**, is an efficient and versatile data structure for triangular meshes  $\Sigma = (v, h, e)$ , where  $v$ ,  $e$ , and  $f$  represent vertices, edges, and faces, respectively. Each edge is split into two directed halfedges denoted as  $h$  and  $h_{dual}$ , linked to associated vertices, edges, faces, and neighboring halfedges, enabling seamless connectivity. This structure excels in localized operations, such as iterating around vertices or faces, which are crucial for tasks like remeshing and curvature computation [? ?]. Its balance of efficiency, flexibility, and ease of use makes it indispensable for advanced mesh processing.

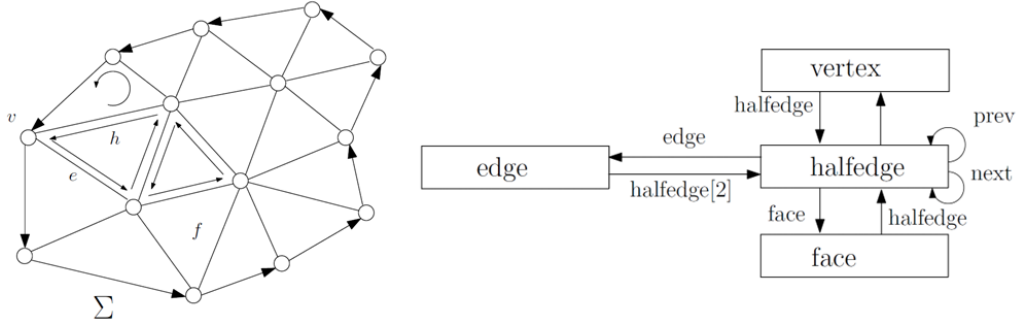

Figure 5. The triangular surface on the left is equipped with a **Half-Edge Data Structure**, illustrated on the right, to enable efficient local mesh operations.[? ]

### Adaptive (Curvature-Guided) Remeshing

Given a triangular mesh  $M = (V, E, F)$ , where  $V$ ,  $E$ , and  $F$  represent vertices, edges, and faces, respectively, adaptive remeshing leverages principal curvatures  $\kappa_1$  and  $\kappa_2$  at each vertex  $v \in V$  to guide the process. Unlike Isotropic remeshing, which relies on the average edge length  $\ell_{avg} = \frac{1}{|E|} \sum_{e \in E} \|e\|$ , adaptive remeshing adjusts edge operations based on curvature, refining high-curvature regions and coarsening flat areas. **Figure 6** contrasts isotropic and adaptive remeshing qualitatively.

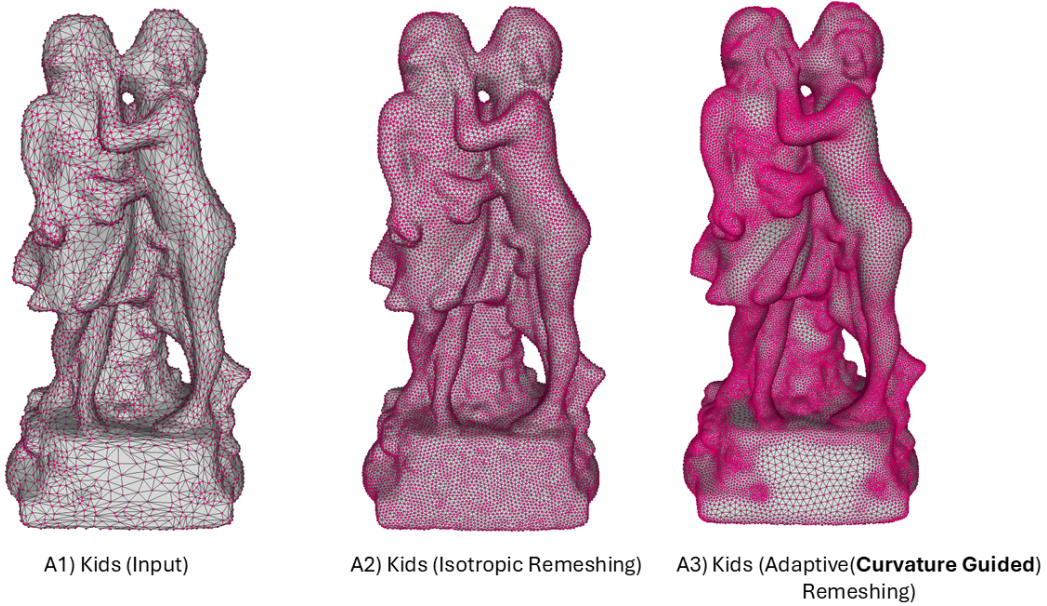

Figure 6. Qualitative comparisons between isotropic remeshing and **adaptive (curvature-guided) remeshing**, highlighting finer resolutions in **high-curvature** regions and coarser resolutions in **low curvature** regions.

## C2. Pseudo Code for Adaptive V-Cycle Remeshing

---

**Algorithm 1:** Gradient Descent with Adaptive V-Cycle Remeshing and Topological Initialization

---

**Input:** Mesh  $M = (V, E, F)$ , learning rate  $\eta$ , remeshing frequency  $f$ , maximum iterations  $T$

**Output:** Optimized vertex positions  $x^*$

Compute the **Euler characteristic**  $X(M) = |V| - |E| + |F|$ ;

Determine the **genus** of the mesh using  $g = (2 - X(M))/2$ ;

Select a triangulated topological primitive with **genus**  $g$  (e.g., ranging from 0 to 5) as the initial mesh  $M = (V, E, F)$ ;

Initialize vertex positions  $x_0$  from  $M$ ;

Set  $\text{isCoarse} \leftarrow \text{True}$ ;

**for**  $t = 0$  **to**  $T - 1$  **do**

**if**  $t \bmod f == 0$  **then**

        Compute mean curvature  $H$  and Gaussian curvature  $K$  at each vertex of  $M$ ;

        Compute principal curvatures  $\kappa_1, \kappa_2$  at each vertex using  $H$  and  $K$ ;

**if**  $\text{isCoarse}$  **then**

$x \leftarrow$  Perform Adaptive V-Cycle Remeshing on  $M$  with Coarse Resolution using  $(\kappa_1, \kappa_2)$ ;

            Set  $\text{isCoarse} \leftarrow \text{False}$ ;

**else**

$x \leftarrow$  Perform Adaptive V-Cycle Remeshing on  $M$  with Fine Resolution using  $(\kappa_1, \kappa_2)$ ;

            Set  $\text{isCoarse} \leftarrow \text{True}$ ;

    Compute the loss function  $L(\Phi(x))$ ;

    Compute gradient  $\nabla_x L(\Phi(x))$ ;

    Update vertex positions:  $x \leftarrow x - \eta \nabla_x L(\Phi(x))$ ;

**return**  $x^*$ ;

---

**Implementation Details.** Our implementation leverages an adaptive curvature-guided remeshing algorithm developed in C++ using the **Half-Edge data structure**, building upon the foundational isotropic remeshing algorithm presented by Botsch *et al.* [?] with modifications that enhance adaptability and performance across diverse scenarios. We use principal curvature to guide the remeshing process, enabling accurate capture of geometric details in complex surfaces. In many applications, adaptive remeshing can utilize other metrics for guidance, such as Von Mises stress in elasticity, energy release rates in fracture mechanics, and high-pressure regions in fluid dynamics. This flexibility allows our approach to be tailored to specific engineering needs, ensuring improved simulation accuracy and computational efficiency across various domains.

## D. Quantitative Comparison Results for Low and High Genus Surfaces

### D1. Quantitative Comparison Results with Nicolet et al.[? ] for Low Genus Surfaces

Table 1. Quantitative comparison with Nicolet et al. [? ] for multi-view reconstructed **low-genus (genus 0)** surfaces: Lower **Chamfer Distance** values mean better results, while higher **Volume IoU** values mean better results. The **Euler characteristic**  $\chi(S) = |V| + |F| - |E|$  and the **genus**  $g$  are used to evaluate topological consistency, where  $g$  represents the number of holes or tunnel loops in the reconstructed surface. Consistent **genus**  $g$  numbers indicate that the reconstructed surfaces match the topology of the target surfaces.

|                            | Chamfer Dist ↓ | Volume IoU ↑  | $ V $   | $ E $     | $ F $   | $\chi(S) =  V  +  F  -  E $ | $g$ |
|----------------------------|----------------|---------------|---------|-----------|---------|-----------------------------|-----|
| <b>Nicolet et al. [? ]</b> |                |               |         |           |         |                             |     |
| Armadillo                  | 0.0018         | 0.8968        | 112,543 | 337,623   | 225,082 | 2                           | 0   |
| Bunny                      | 0.0021         | 0.8263        | 140,607 | 421,815   | 281,210 | 2                           | 0   |
| Nefertiti                  | 0.0018         | 0.8768        | 138,695 | 416,079   | 277,386 | 2                           | 0   |
| Planck                     | 0.0019         | <b>0.9369</b> | 146,027 | 438,075   | 292,050 | 2                           | 0   |
| Mario                      | <b>0.0024</b>  | 0.8683        | 155,211 | 465,627   | 310,418 | 2                           | 0   |
| Lion                       | 0.0019         | 0.6685        | 186,481 | 559,437   | 372,958 | 2                           | 0   |
| <b>Ours (Hybrid)</b>       |                |               |         |           |         |                             |     |
| Armadillo                  | <b>0.0015</b>  | <b>0.9283</b> | 137,394 | 412,176   | 274,784 | 2                           | 0   |
| Bunny                      | <b>0.0020</b>  | <b>0.8296</b> | 152,642 | 457,920   | 305,280 | 2                           | 0   |
| Nefertiti                  | <b>0.0017</b>  | <b>0.9158</b> | 329,304 | 987,906   | 658,604 | 2                           | 0   |
| Planck                     | <b>0.0018</b>  | 0.9261        | 436,224 | 1,308,666 | 872,444 | 2                           | 0   |
| Mario                      | <b>0.0024</b>  | <b>0.9003</b> | 79,032  | 237,090   | 158,060 | 2                           | 0   |
| Lion                       | <b>0.0018</b>  | <b>0.6835</b> | 17,594  | 52,776    | 35,184  | 2                           | 0   |

### D2. Quantitative Comparison Results with Nicolet et al.[? ] for High Genus Surfaces

Table 2. Quantitative comparison with Nicolet et al. [? ] for multi-view reconstructed **high-genus** surfaces: Lower **Chamfer Distance** values mean better results, while higher **Volume IoU** values mean better results. The **Euler characteristic**  $\chi(S) = |V| + |F| - |E|$  and the **genus**  $g$  are used to evaluate topological consistency, where  $g$  represents the number of holes or tunnel loops in the reconstructed surface. Consistent **genus**  $g$  numbers indicate that the reconstructed surfaces match the topology of the target surfaces.

|                            | Chamfer Dist ↓ | Volume IoU ↑  | $ V $   | $ E $   | $ F $   | $\chi(S) =  V  +  F  -  E $ | $g$ |
|----------------------------|----------------|---------------|---------|---------|---------|-----------------------------|-----|
| <b>Nicolet et al. [? ]</b> |                |               |         |         |         |                             |     |
| Kitten                     | 0.0039         | 0.6298        | 134,761 | 404,283 | 269,522 | 0                           | 1   |
| Amphora                    | 0.0054         | 0.4581        | 91,014  | 273,048 | 182,032 | 2                           | 2   |
| Pretzel                    | 0.0040         | 0.6518        | 73,059  | 219,189 | 146,126 | 4                           | 3   |
| Birthay                    | 0.0020         | 0.4914        | 28,442  | 85,344  | 56,896  | 6                           | 4   |
| Sorter                     | 0.0672         | 0.2901        | 84,189  | 252,591 | 168,394 | 8                           | 5   |
| <b>Ours (Hybrid)</b>       |                |               |         |         |         |                             |     |
| Kitten                     | <b>0.0025</b>  | <b>0.7126</b> | 15,638  | 46,914  | 31,276  | 0                           | 1   |
| Amphora                    | <b>0.0033</b>  | <b>0.7924</b> | 15,554  | 46,668  | 31,112  | 2                           | 2   |
| Pretzel                    | <b>0.0025</b>  | <b>0.8639</b> | 150,735 | 452,217 | 301,478 | 4                           | 3   |
| Birthay                    | <b>0.0006</b>  | <b>0.8849</b> | 10,197  | 30,609  | 20,406  | 6                           | 4   |
| Sorter                     | <b>0.0040</b>  | <b>0.7504</b> | 298,083 | 894,273 | 596,182 | 8                           | 5   |

### D.3 Quantitative Comparison Results with Nicolet et al.[?] ] for Challenging High Genus Surfaces

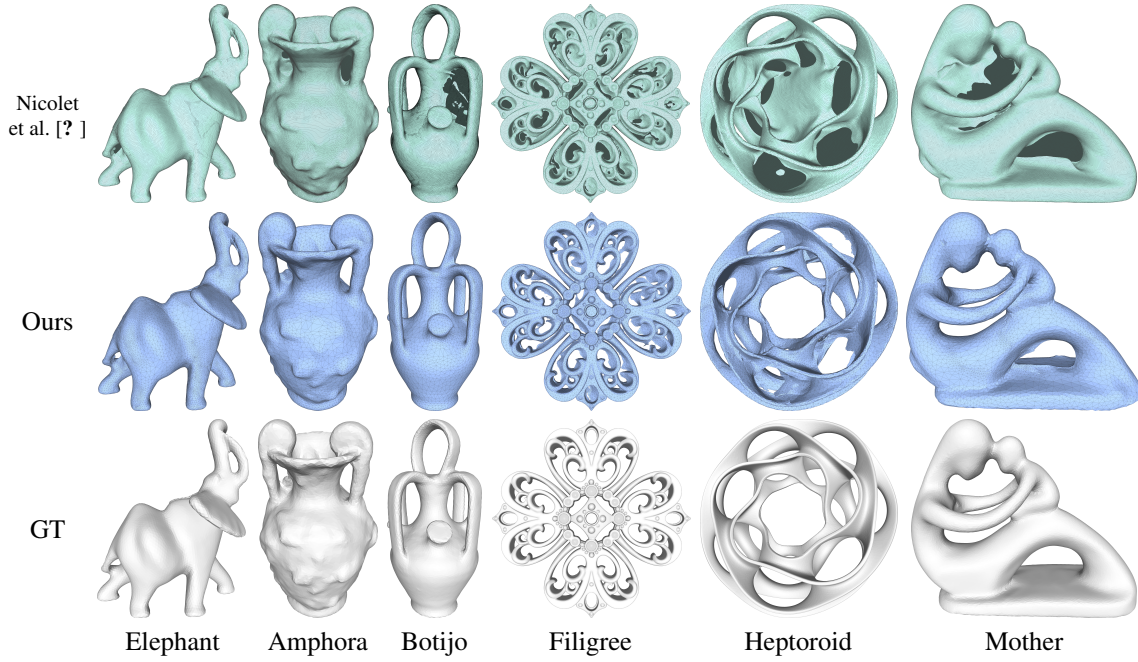

Table 3. Quantitative comparison with Nicolet et al. [?] ] for multi-view reconstructed **Challenging high-genus** surfaces: Lower **Chamfer Distance** values mean better results, while higher **Volume IoU** values mean better results.

| Model     | Chamfer Dist ↓ |               | Volume IoU ↑ |               |
|-----------|----------------|---------------|--------------|---------------|
|           | [? ]           | Ours          | [? ]         | Ours          |
| Elephant  | 0.0035         | <b>0.0008</b> | 0.5297       | <b>0.7606</b> |
| Amphora   | 0.0062         | <b>0.0031</b> | 0.4271       | <b>0.7443</b> |
| Botijo    | 0.0053         | <b>0.0032</b> | 0.4541       | <b>0.8192</b> |
| Filigree  | 0.0019         | <b>0.0018</b> | 0.7365       | <b>0.8204</b> |
| Heptoroid | 0.0074         | <b>0.0029</b> | 0.5642       | <b>0.8297</b> |
| Mother    | 0.0060         | <b>0.0046</b> | 0.4766       | <b>0.5025</b> |
